# Supplementary material for: 5-ALA-assistant automated detection of lymph node metastasis in gastric cancer patients
Source: PubMed Central journal article supplement (PMC7305096; doi:10.1007/s10120-020-01044-w), 2020-02-11
Supplement: 10120_2020_1044_MOESM1_ESM.pdf [file 10120_2020_1044_MOESM1_ESM.pdf]

## Supporting Information

### 5-ALA-assistant automated detection of lymph node metastasis in gastric cancer patients

Tatsuya Matsumoto<sup>1,2</sup>, Yasutoshi Murayama<sup>1</sup>, Hisataka Matsuo<sup>1,2</sup>, Kengo Okochi<sup>3</sup>, Naotaka Koshiishi<sup>3</sup>, Yoshinori Harada<sup>2</sup>, Hideo Tanaka<sup>2</sup>, Tetsuro Takamatsu<sup>2,4</sup>, Eigo Otsuji<sup>1</sup>

<sup>1</sup>Division of Digestive Surgery, Department of Surgery, Kyoto Prefectural University of Medicine, 465 Kajicho, Kawaramachi-Hirokoji, Kamigyo-ku, Kyoto 6028566, Japan

<sup>2</sup>Department of Pathology and Cell Regulation, Kyoto Prefectural University of Medicine, 465 Kajicho, Kawaramachi-Hirokoji, Kamigyo-ku, Kyoto 6028566, Japan

<sup>3</sup>Ushio Inc., 6409 Moto-Ishikawa-cho, Aoba-ku, Yokohama, Kanagawa 2250004, Japan

<sup>4</sup>Department of Medical Photonics, Kyoto Prefectural University of Medicine, 465 Kajicho, Kawaramachi-Hirokoji, Kamigyo-ku, Kyoto 6028566, Japan

**Supplementary table 1 Results of automated metastasis-detection with the differential and ratio methods**

|                     |          | H&E histology       |                     |       |
|---------------------|----------|---------------------|---------------------|-------|
|                     |          | Metastasis-positive | Metastasis-negative | Total |
| Differential method | Positive | 32                  | 9                   | 41    |
|                     | Negative | 9                   | 273                 | 282   |
|                     | Total    | 41                  | 282                 | 323   |

|              |          | H&E histology       |                     |       |
|--------------|----------|---------------------|---------------------|-------|
|              |          | Metastasis-positive | Metastasis-negative | Total |
| Ratio method | Positive | 32                  | 11                  | 43    |
|              | Negative | 9                   | 271                 | 280   |
|              | Total    | 41                  | 282                 | 323   |

n = 323 LNs from 64 patients
